# Supplementary material for: Odd versus even: a scientific study of the ‘rules’ of plating
Source: PeerJ. 2016 Jan 4;4:e1526. doi: 10.7717/peerj.1526 (PMC4734449; doi:10.7717/peerj.1526)
Supplement: Supplemental Information 4 [file peerj-04-1526-s004.csv]

no_no_i3_v1	no_no_i3_v0	no_no_i4_v1	no_no_i4_v0	ro_la_i3_v1	ro_la_i3_v0	ro_la_i4_v1	ro_la_i4_v0	ro_re_i3_v1	ro_re_i3_v0	ro_re_i4_v1	ro_re_i4_v0	sq_la_i3_v1	sq_la_i3_v0	sq_la_i4_v1	sq_la_i4_v0	sq_re_i3_v1	sq_re_i3_v0	sq_re_i4_v1	sq_re_i4_v0
-0.06749017	0.015044719	0.051706823	0.014723257	-0.019717388	-0.047746111	0.00496342	0.04275198	-0.019717388	-0.047746111	0.033608601	-0.0257054	0.023317245	0.05491623	-0.036429266	0.033608601	-0.057505949	-0.047746111	0.04275198	0.00496342
																					plateShape
-0.019717388	-0.077709335	-0.0257054	-0.058705661	-0.038200793	-0.077709335	-0.082186756	-0.058705661	-0.028860767	-0.098898634	-0.094421213	-0.058705661	-0.121175029	-0.028860767	-0.10701034	-0.082186756	-0.077709335	-0.077709335	-0.10701034	-0.04742465		sq	square
0.015044719	0.031435134	0.093904503	0.060480747	0.015044719	0.023317245	0.014723257	0.060480747	-0.019717388	0.077192625	0.04275198	0.024268575	-0.019717388	0.039404064	0.033608601	0.060480747	0.062469368	0.023317245	0.04275198	0.077514087		ro	round
0.174102638	-0.121175029	0.014723257	0.051706823	-0.182444685	-0.088174768	-0.207125493	0.060480747	-0.156890581	-0.088174768	-0.207125493	-0.036429266	-0.209596932	-0.23694332	-0.015239967	-0.0257054	0.176988326	-0.088174768	-0.036429266	0.051706823
-0.132756901	0.062469368	-0.082186756	-0.0257054	-0.088174768	-0.098898634	-0.094421213	-0.015239967	-0.001988621	-0.06749017	0.033608601	-0.10701034	-0.028860767	-0.038200793	0.00496342	-0.070287533	-0.06749017	0.006611551	-0.082186756	-0.04742465		plateSize
0.015044719	0.039404064	0.014723257	0.10969877	0.015044719	0.031435134	0.060480747	0.160851292	0.031435134	0.047229402	0.00496342	0.014723257	-0.001988621	0.05491623	0.00496342	-0.0257054	-0.028860767	0.031435134	0.033608601	-0.0257054		la	large
0.047229402	0.039404064	0.024268575	0.014723257	0.069893386	0.023317245	0.033608601	0.077514087	-0.010762545	0.062469368	0.04275198	0.04275198	-0.001988621	0.015044719	0.101873433	0.051706823	0.023317245	0.039404064	0.014723257	0.069080919		re	regular
-0.028860767	-0.028860767	-0.005020801	0.033608601	-0.047746111	0.006611551	-0.0257054	-0.005020801	-0.001988621	0.015044719	-0.015239967	0.033608601	-0.010762545	-0.001988621	-0.094421213	0.014723257	-0.057505949	-0.088174768	-0.04742465	-0.015239967		no	none
0.015044719	0.031435134	0.060480747	0.077514087	0.006611551	0.039404064	0.060480747	0.051706823	0.039404064	0.006611551	0.060480747	0.10969877	0.015044719	-0.001988621	0.051706823	0.069080919	0.039404064	0.015044719	0.033608601	0.033608601		items
0.023317245	0.006611551	0.060480747	0.051706823	-0.019717388	-0.001988621	0.069080919	0.093904503	0.006611551	-0.028860767	0.00496342	0.04275198	0.006611551	-0.028860767	0.060480747	0.093904503	0.015044719	0.023317245	0.00496342	0.069080919		i3
-0.057505949	-0.109894018	-0.070287533	0.024268575	-0.028860767	0.006611551	-0.04742465	-0.070287533	-0.088174768	-0.001988621	-0.10701034	-0.036429266	-0.028860767	-0.077709335	-0.015239967	-0.04742465	-0.132756901	-0.001988621	-0.070287533	0.033608601		i4
-0.109894018	-0.132756901	0.051706823	-0.015239967	-0.144656124	-0.238560628	-0.04742465	-0.191331226	-0.182444685	-0.263315581	-0.119975317	-0.176091259	-0.209596932	-0.132756901	-0.161368002	-0.082186756	-0.182444685	-0.182444685	0.117385599	-0.119975317
-0.019717388	0.062469368	0.047252482	0.014723257	0.047229402	0.111954731	-0.010100327	0.101873433	0.010848604	0.051089822	0.073317972	0.014723257	0.058709219	0.069893386	0.033608601	0.019522139	-0.06749017	0.039404064	0.009870754	0.093904503		itemArrangement
																					v0	not vertical (polygon)
-0.109894018	0.006611551	-0.10701034	0.033608601	-0.098898634	0.077192625	-0.036429266	-0.133339279	-0.028860767	0.015044719	-0.133339279	-0.10701034	-0.077709335	0.023317245	-0.005020801	-0.094421213	0.002332753	-0.028860767	-0.036429266	-0.04742465		v1	vertical
-0.06749017	0.019200678	-0.036429266	-0.0257054	-0.057505949	-0.001988621	-0.036429266	0.033608601	-0.057505949	-0.098898634	-0.058705661	-0.04742465	-0.019717388	-0.06749017	-0.036429266	-0.04742465	-0.047746111	-0.06749017	-0.015239967	-0.04742465
0.174102638	0.131550287	0.085786613	0.250812445	0.08437121	0.091433064	0.1744241	0.206608783	0.174102638	0.08437121	0.124938736	0.236572006	0.08437121	0.111954731	0.124938736	0.124938736	0.174102638	0.153347417	0.146840578	0.124938736
0.08437121	0.077192625	0.00496342	0.10969877	0.077192625	0.098381924	0.093904503	0.069080919	0.08437121	0.047229402	0.04275198	0.033608601	0.091433064	0.098381924	0.085786613	0.117385599	0.098381924	0.098381924	0.077514087	0.014723257
0.047229402	0.015044719	0.04275198	0.117385599	0.031435134	-0.019717388	0.124938736	0.069080919	0.091433064	-0.038200793	-0.058705661	0.060480747	0.039404064	-0.001988621	0.033608601	-0.005020801	-0.028860767	0.023317245	-0.015239967	-0.058705661
0.156373871	0.006611551	0.10969877	0.139661993	0.125116177	0.11858531	0.1744241	0.153902432	0.05491623	0.047229402	0.153902432	0.153902432	0.150299723	0.131550287	0.101873433	0.069080919	0.091433064	0.111954731	0.132362755	0.1744241
0.015044719	0.069893386	0.153902432	0.132362755	0.062469368	0.047229402	0.00496342	0.10969877	-0.038200793	0.047229402	-0.0257054	0.069080919	0.105221349	0.091433064	-0.015239967	0.069080919	0.047229402	0.035437877	0.00496342	0.160851292
-0.047746111	-0.019717388	-0.036429266	-0.036429266	-0.028860767	0.062469368	-0.005020801	-0.015239967	-0.019717388	0.015044719	-0.058705661	-0.0257054	-0.028860767	-0.06749017	-0.0257054	-0.015239967	-0.001988621	0.015044719	-0.058705661	-0.015239967
0.047229402	-0.038200793	-0.0257054	0.069080919	-0.038200793	0.031435134	0.033608601	0.085786613	-0.001988621	-0.057505949	0.051706823	-0.04742465	0.023317245	-0.047746111	0.024268575	0.085786613	-0.019717388	0.031435134	0.069080919	-0.036429266
0.047229402	-0.038200793	0.10969877	-0.147127563	0.039404064	0.031435134	-0.0257054	0.10969877	-0.010762545	-0.088174768	0.04275198	0.00496342	-0.098898634	-0.077709335	0.04275198	0.085786613	-0.057505949	0.023317245	0.069080919	-0.094421213
0.066197241	0.006611551	-0.036429266	0	-0.06749017	0.043334358	-0.04742465	0.056115942	0.035437877	-0.024265015	-0.010100327	0.038204353	-0.010762545	-0.028860767	-0.005020801	0.019522139	-0.015216886	-0.024265015	-0.076196392	-0.04742465
0.039404064	-0.001988621	-0.015239967	0.085786613	-0.028860767	0.047229402	-0.082186756	-0.058705661	-0.019717388	0.023317245	-0.070287533	0.024268575	0.039404064	-0.028860767	-0.036429266	0.024268575	0.047229402	0.031435134	-0.015239967	-0.04742465
-0.057505949	-0.001988621	-0.0257054	0.014723257	-0.047746111	-0.028860767	-0.058705661	0.014723257	-0.047746111	-0.028860767	-0.036429266	-0.0257054	-0.057505949	-0.019717388	-0.0257054	0.024268575	-0.077709335	-0.077709335	-0.058705661	0.024268575
0.031435134	0.039404064	0.00496342	0.051706823	0.015044719	0.015044719	0.033608601	0.069080919	0.006611551	0.047229402	0.033608601	0.085786613	0.015044719	0.05491623	0.033608601	0.060480747	-0.001988621	0.023317245	0.060480747	0.2563804
-0.175913818	-0.088174768	-0.094421213	-0.064457989	-0.06749017	-0.093503602	-0.119975317	-0.041892161	-0.202648072	-0.16313953	-0.10701034	-0.126605896	-0.121175029	-0.109894018	-0.094421213	-0.064457989	-0.195808647	-0.169479708	-0.199156563	-0.082186756
0.031435134	0.062469368	0.093904503	0.051706823	0.062469368	0.077192625	0.085786613	0.051706823	0.023317245	-0.047746111	-0.04742465	0.093904503	0.023317245	0.091433064	0.060480747	0.04275198	0.006611551	0.031435134	-0.005020801	0.033608601
-0.019717388	-0.038200793	-0.005020801	0.04275198	0.039404064	0.05491623	-0.070287533	0.077514087	-0.019717388	0.023317245	0.014723257	-0.005020801	-0.06749017	-0.047746111	-0.005020801	0.077514087	-0.028860767	0.006611551	-0.191331226	0.033608601
-0.052598614	-0.038200793	0.200359834	0.033608601	-0.047746111	-0.001988621	-0.140178703	-0.005020801	-0.121175029	-0.057505949	-0.076196392	-0.058705661	-0.088174768	-0.062469368	-0.015239967	-0.070287533	-0.06749017	-0.10436153	-0.088260904	-0.036429266
-0.001988621	-0.047746111	-0.0257054	0.04275198	-0.019717388	-0.010762545	-0.005020801	0.033608601	-0.019717388	-0.019717388	-0.04742465	0.014723257	-0.047746111	0.05491623	-0.0257054	0.033608601	-0.001988621	-0.06749017	-0.058705661	0.014723257
0.015044719	0.015044719	0.101873433	-0.119975317	-0.019717388	0.047229402	0.324781732	0.124938736	0.069893386	0.023317245	0.283944383	0.077514087	0.238560627	-0.038200793	0.069080919	0.077514087	-0.001988621	-0.038200793	-0.133339279	0.014723257
-0.019717388	-0.001988621	0.04275198	0.085786613	-0.077709335	-0.098898634	-0.094421213	0.00496342	-0.028860767	-0.010762545	-0.082186756	-0.133339279	-0.144656124	-0.028860767	-0.0257054	-0.005020801	-0.001988621	-0.019717388	-0.082186756	-0.036429266
-0.047746111	-0.057505949	-0.161368002	-0.0257054	-0.132756901	-0.144656124	-0.133339279	-0.04742465	-0.209596932	-0.088174768	-0.094421213	-0.10701034	-0.038200793	-0.038200793	-0.133339279	0.21884324	-0.088174768	-0.144656124	-0.240549248	-0.094421213
0.159379381	0.08437121	0.04275198	0.060480747	0.1855321	0.077192625	0.014723257	0.051706823	0.174102638	0.11858531	-0.015239967	0.04275198	0.077192625	-0.047746111	0.085786613	-0.058705661	0.174102638	0.08437121	0.117385599	0.153902432
0.006611551	0.05491623	-0.005020801	0.117385599	0.015044719	-0.028860767	0.024268575	0.077514087	-0.057505949	-0.038200793	-0.082186756	-0.094421213	0.015044719	-0.047746111	-0.005020801	0.060480747	-0.06749017	-0.038200793	-0.005020801	0.060480747
-0.001988621	-0.077709335	-0.133339279	-0.0257054	-0.010762545	-0.010762545	-0.070287533	-0.015239967	-0.169479708	-0.001988621	0.04275198	0.069080919	0.023317245	-0.156890581	-0.10701034	0.014723257	-0.121175029	-0.077709335	-0.133339279	-0.015239967
0.062469368	-0.010762545	0.051706823	-0.04742465	-0.028860767	-0.001988621	0.04275198	0.024268575	-0.006353426	-0.047746111	0.024268575	0.024268575	-0.010762545	-0.057505949	0.051706823	0.033608601	-0.010762545	-0.047746111	0.014723257	0.04275198
0.179854967	0.193911032	0.230742463	0.132362755	0.153347417	0.193911032	0.136027709	0.250812445	0.179854967	0.137890465	0.069080919	0.117385599	0.188343077	0.031435134	0.184332388	0.085786613	0.094921392	0.174102638	0.085786613	0.184332388
0.051089822	0.031435134	-0.041892161	-0.04742465	0.035437877	-0.132756901	0.033608601	-0.031034234	-0.10436153	-0.006353426	0.081670047	0.024268575	-0.038200793	0.002332753	-0.100670162	0.014723257	-0.047746111	0.002332753	-0.191331226	-0.036429266
0.015044719	0.015044719	0.00496342	0.093904503	0.023317245	0.062469368	0.00496342	0.069080919	0.006611551	0.039404064	0.014723257	0.024268575	0.023317245	0.023317245	0.024268575	0.033608601	0.069893386	-0.001988621	0.00496342	0.04275198
-0.057505949	-0.098898634	-0.0257054	-0.058705661	-0.047746111	-0.001988621	-0.04742465	-0.070287533	-0.098898634	-0.06749017	-0.082186756	-0.082186756	-0.077709335	-0.077709335	-0.133339279	-0.058705661	-0.06749017	-0.132756901	-0.119975317	-0.10701034
-0.001988621	-0.057505949	0.024268575	0.024268575	-0.010762545	-0.001988621	0.00496342	0.00496342	-0.088174768	-0.057505949	-0.015239967	-0.005020801	-0.06749017	0.015044719	-0.10701034	0.014723257	-0.019717388	-0.182444685	-0.119975317	-0.005020801
-0.042947228	0.08791649	-0.015239967	-0.100670162	0.039404064	-0.006353426	0.069080919	-0.010100327	-0.038200793	-0.052598614	-0.088260904	-0.053028528	0.039404064	-0.033505672	-0.041892161	0.014723257	-0.006353426	-0.033505672	-0.0257054	-0.031034234
0.062469368	0.047229402	0.077514087	0.139661993	0.006611551	0.098381924	0.153902432	0.124938736	0.031435134	0.069893386	0.051706823	0.124938736	0.05491623	0.062469368	0.051706823	0.124938736	0.077192625	0.098381924	0.124938736	0.117385599
-0.182444685	-0.121175029	-0.207125493	-0.10701034	-0.156890581	-0.121175029	-0.191331226	-0.10701034	-0.195808647	-0.132756901	-0.207125493	-0.191331226	-0.156890581	-0.121175029	-0.207125493	-0.191331226	-0.156890581	-0.182444685	-0.240549248	-0.207125493
-0.038200793	-0.047746111	-0.0257054	-0.070287533	0.015044719	-0.010762545	-0.005020801	-0.036429266	0.006611551	-0.088174768	-0.119975317	-0.015239967	-0.088174768	-0.010762545	-0.058705661	-0.04742465	-0.057505949	-0.047746111	-0.082186756	-0.133339279
0.015044719	0.006611551	0.014723257	0.093904503	-0.019717388	0.069893386	0.04275198	0.077514087	-0.028860767	0.015044719	-0.04742465	0.033608601	-0.001988621	-0.010762545	0.117385599	0.024268575	0.023317245	-0.028860767	0.04275198	0.033608601
0.031435134	0.062469368	-0.005020801	0.051706823	-0.001988621	0.031435134	0.051706823	0.060480747	0.031435134	-0.010762545	-0.0257054	0.00496342	0.05491623	0.031435134	0.04275198	0.04275198	0.05491623	0.023317245	-0.036429266	-0.0257054
0.125116177	0.11858531	0.139661993	0.093904503	0.039404064	0.062469368	0.124938736	0.124938736	0.08437121	0.08437121	0.081670047	0.10969877	0.08437121	0.069893386	0.146840578	0.117385599	0.05491623	0.077192625	0.069080919	0.077514087
-0.028860767	-0.028860767	-0.10701034	-0.070287533	-0.077709335	-0.047746111	-0.147127563	0.014723257	-0.182444685	-0.132756901	-0.161368002	-0.036429266	-0.223837371	-0.038200793	-0.10701034	-0.119975317	0.031435134	-0.06749017	-0.176091259	-0.04742465
0.039404064	-0.038200793	0.00496342	0.014723257	0.006611551	0.023317245	-0.04742465	0.024268575	-0.001988621	0.006611551	0.033608601	-0.0257054	-0.057505949	0.023317245	0.014723257	0.024268575	-0.001988621	-0.038200793	-0.036429266	-0.10701034
0.08437121	0.105221349	0.069080919	0.1744241	0.006611551	0.015044719	0.153902432	0.117385599	0.047229402	0.047229402	-0.04742465	0.069080919	0.039404064	0.023317245	-0.058705661	0.101873433	0.105221349	0.125116177	-0.070287533	0.00496342
0.196668466	0.08437121	0.051706823	0.200359834	0.196668466	0.098381924	0.236572006	0.181054678	0.039404064	0.207526394	0.248001468	0.194019656	0.08437121	0.156373871	0.139661993	0.117385599	0.179854967	0.223320661	0.194019656	0.181054678
0.015044719	-0.010762545	-0.005020801	-0.10701034	-0.028860767	-0.109894018	-0.070287533	0.033608601	-0.06749017	-0.098898634	0.033608601	-0.015239967	-0.038200793	-0.088174768	-0.070287533	-0.036429266	-0.098898634	-0.06749017	-0.04742465	-0.070287533
-0.047746111	-0.010762545	-0.04742465	0.014723257	-0.047746111	-0.047746111	-0.036429266	0.04275198	0.015044719	-0.019717388	-0.070287533	0.00496342	0.006611551	0.006611551	-0.036429266	-0.005020801	-0.038200793	0.006611551	-0.015239967	-0.036429266
0.047229402	0.062469368	0.060480747	0.033608601	0.039404064	0.062469368	0.085786613	0.085786613	0.039404064	0.05491623	0.04275198	0.077514087	0.105221349	0.023317245	0.04275198	0.077514087	0.08437121	0.039404064	0.024268575	0.077514087
-0.028860767	-0.019717388	0.033608601	-0.070287533	-0.109894018	0.031435134	-0.161368002	0.014723257	-0.121175029	-0.109894018	-0.094421213	0.04275198	-0.132756901	-0.121175029	-0.036429266	-0.015239967	-0.057505949	-0.098898634	-0.082186756	-0.133339279
0.066197241	0.027395157	0.089864525	0.105803726	-0.001988621	0.039404064	0.093904503	0.060480747	0.105221349	0.07355834	0.028963696	0.139661993	0.05491623	0.006611551	-0.015239967	0.081670047	-0.028860767	0.098381924	0.064802121	0.167690717
-0.082910528	-0.052598614	-0.041892161	0.009870754	-0.015216886	0.023317245	-0.015239967	0.047252482	-0.052598614	-0.047746111	-0.041892161	-0.005020801	-0.088174768	-0.024265015	0.024268575	0.04275198	-0.06749017	-0.082910528	-0.082186756	0.009870754
0.023317245	-0.077709335	0.033608601	0.069080919	-0.019717388	-0.001988621	0.033608601	0.077514087	-0.077709335	-0.038200793	-0.094421213	0.047252482	0.015044719	-0.038200793	-0.094421213	0.060480747	-0.001988621	0.023317245	0.051706823	0.04275198
-0.038200793	-0.121175029	-0.0257054	-0.082186756	-0.028860767	-0.038200793	-0.04742465	-0.070287533	-0.144656124	-0.182444685	-0.015239967	-0.082186756	-0.028860767	-0.047746111	-0.036429266	-0.070287533	-0.010762545	-0.132756901	0.014723257	-0.04742465
-0.06749017	-0.220981878	-0.133339279	-0.094421213	-0.098898634	-0.195808647	-0.191331226	-0.070287533	-0.223837371	-0.088174768	-0.147127563	-0.176091259	-0.182444685	-0.132756901	-0.10701034	-0.10701034	-0.169479708	-0.223837371	-0.133339279	-0.082186756
-0.010762545	-0.028860767	-0.058705661	-0.005020801	-0.019717388	0.015044719	-0.0257054	0.014723257	-0.057505949	-0.047746111	-0.04742465	-0.070287533	-0.038200793	0.031435134	-0.015239967	0.014723257	-0.047746111	-0.121175029	0.00496342	0.00496342
-0.001988621	-0.047746111	0.069080919	0.051706823	-0.038200793	0.006611551	-0.005020801	0.10969877	-0.001988621	0.023317245	-0.070287533	0.060480747	-0.038200793	0.08437121	-0.04742465	0.04275198	0.023317245	-0.019717388	-0.0257054	-0.005020801
0.031435134	-0.019717388	-0.015239967	0.014723257	0.05491623	0.031435134	0.024268575	0.060480747	0.031435134	-0.001988621	0.00496342	0.00496342	0.015044719	0.006611551	0.033608601	0.04275198	0.031435134	0.015044719	-0.005020801	-0.005020801
-0.169479708	-0.098898634	-0.140178703	-0.207125493	-0.132756901	-0.126927358	-0.10701034	-0.058705661	-0.216658786	-0.138665761	-0.082186756	-0.070287533	-0.121175029	-0.132756901	-0.140178703	-0.133339279	-0.132756901	-0.138665761	-0.140178703	-0.11344445
-0.06749017	-0.001988621	-0.04742465	-0.04742465	-0.038200793	0.031435134	-0.0257054	-0.058705661	-0.098898634	0.023317245	-0.005020801	-0.082186756	-0.088174768	-0.038200793	-0.015239967	-0.0257054	-0.010762545	-0.06749017	-0.082186756	-0.015239967
0.006611551	0.015044719	0.033608601	0.077514087	0.023317245	-0.001988621	0.014723257	0.051706823	0.015044719	-0.001988621	-0.005020801	-0.005020801	0.05491623	-0.028860767	0.04275198	0.04275198	-0.077709335	0.015044719	0.00496342	0.00496342
-0.144656124	-0.156890581	-0.147127563	-0.240549248	-0.098898634	-0.242612108	-0.240549248	-0.126605896	-0.121175029	-0.253800594	-0.240549248	-0.147127563	-0.156890581	-0.057505949	-0.161368002	-0.161368002	-0.088174768	-0.209596932	-0.231949076	-0.133339279
0.006611551	0.077192625	0.04275198	0.014723257	0.115282675	0.069893386	0.093904503	0.060480747	0.023317245	0.062469368	0.024268575	0.085786613	0.098381924	0.08437121	-0.015239967	0.121178588	0.039404064	0.098381924	-0.036429266	0.093904503
0.047229402	-0.001988621	-0.0257054	0.04275198	0.006611551	-0.010762545	-0.058705661	0.051706823	0.015044719	0.015044719	-0.041892161	-0.005020801	0.023317245	-0.028860767	-0.015239967	0.051706823	-0.028860767	0.031435134	0.00496342	0.093904503
-0.115497896	-0.024265015	-0.147127563	-0.076196392	-0.098898634	-0.062469368	-0.133339279	0.00496342	-0.10436153	-0.047746111	-0.126605896	0.009870754	-0.115497896	-0.121175029	-0.161368002	-0.04742465	-0.175913818	-0.015216886	-0.094421213	-0.070287533
-0.001988621	-0.001988621	0.033608601	0.04275198	0.015044719	-0.019717388	0.00496342	0.014723257	-0.098898634	-0.077709335	0.00496342	-0.0257054	-0.038200793	0.006611551	-0.036429266	0.04275198	-0.121175029	-0.06749017	0.014723257	-0.133339279
0.156373871	0.179854967	0.139661993	0.236572006	0.196668466	0.077192625	0.253605346	0.1744241	0.212855227	0.105221349	0.194019656	0.259137834	0.150299723	0.144139415	0.266574668	0.167690717	0.202131362	0.131550287	0.230742463	0.230742463
-0.038200793	0.039404064	-0.0257054	0.00496342	0.006611551	0.006611551	0.033608601	0.00496342	-0.010762545	0.023317245	0.00496342	0.051706823	-0.010762545	-0.001988621	0.077514087	0.060480747	0.015044719	-0.019717388	-0.036429266	0.060480747
-0.209596932	-0.057505949	-0.133339279	-0.082186756	-0.195808647	-0.182444685	-0.10701034	-0.218214677	-0.169479708	-0.121175029	-0.223515909	-0.240549248	-0.144656124	-0.132756901	-0.223515909	-0.176091259	-0.182444685	-0.109894018	-0.133339279	-0.119975317
0.05491623	-0.001988621	0.117385599	0.153902432	0.111954731	0.077192625	0.10969877	0.085786613	0.098381924	0.047229402	0.10969877	0.139661993	0.098381924	0.062469368	0.167690717	0.117385599	0.098381924	0.08437121	0.153902432	0.101873433
0.047229402	0.091433064	0.117385599	0.139661993	0.047229402	0.015044719	0.139661993	0.101873433	0.091433064	0.08437121	0.101873433	0.077514087	0.08437121	0.062469368	0.153902432	0.153902432	0.091433064	0.062469368	0.085786613	0.146840578
